# Supplementary material for: Towards Chemoenzymatic Syntheses of Both Enantiomers of Phosphoemeriamine
Source: MDPI journal article supplement (doi:10.3390/molecules29081799), 2024-04-16

## SUPPORTING INFORMATION

# Towards Chemoenzymatic Syntheses of Both Enantiomers of Phosphoemeriamine

Piotr Kielbasiński \*, Małgorzata Kwiatkowska, Piotr Łyzwa and Marian Mikołajczyk

Division of Organic Chemistry, Centre of Molecular and Macromolecular Studies, Polish Academy of Sciences, Sienkiewicza 112, 90-363 Łódź, Poland;  
malgorzata.kwiatkowska@cbmm.lodz.pl (M.K.); plyzwa@interia.pl (P.Ł.);  
marian.mikolajczyk@cbmm.lodz.pl (M.M.)

\* Correspondence: piotr.kielbasinski@cbmm.lodz.pl

*Diethyl 2-azido-3-*N,N*-dimethylaminopropylphosphonate* **11**  
<sup>31</sup>P NMR (CDCl<sub>3</sub>)

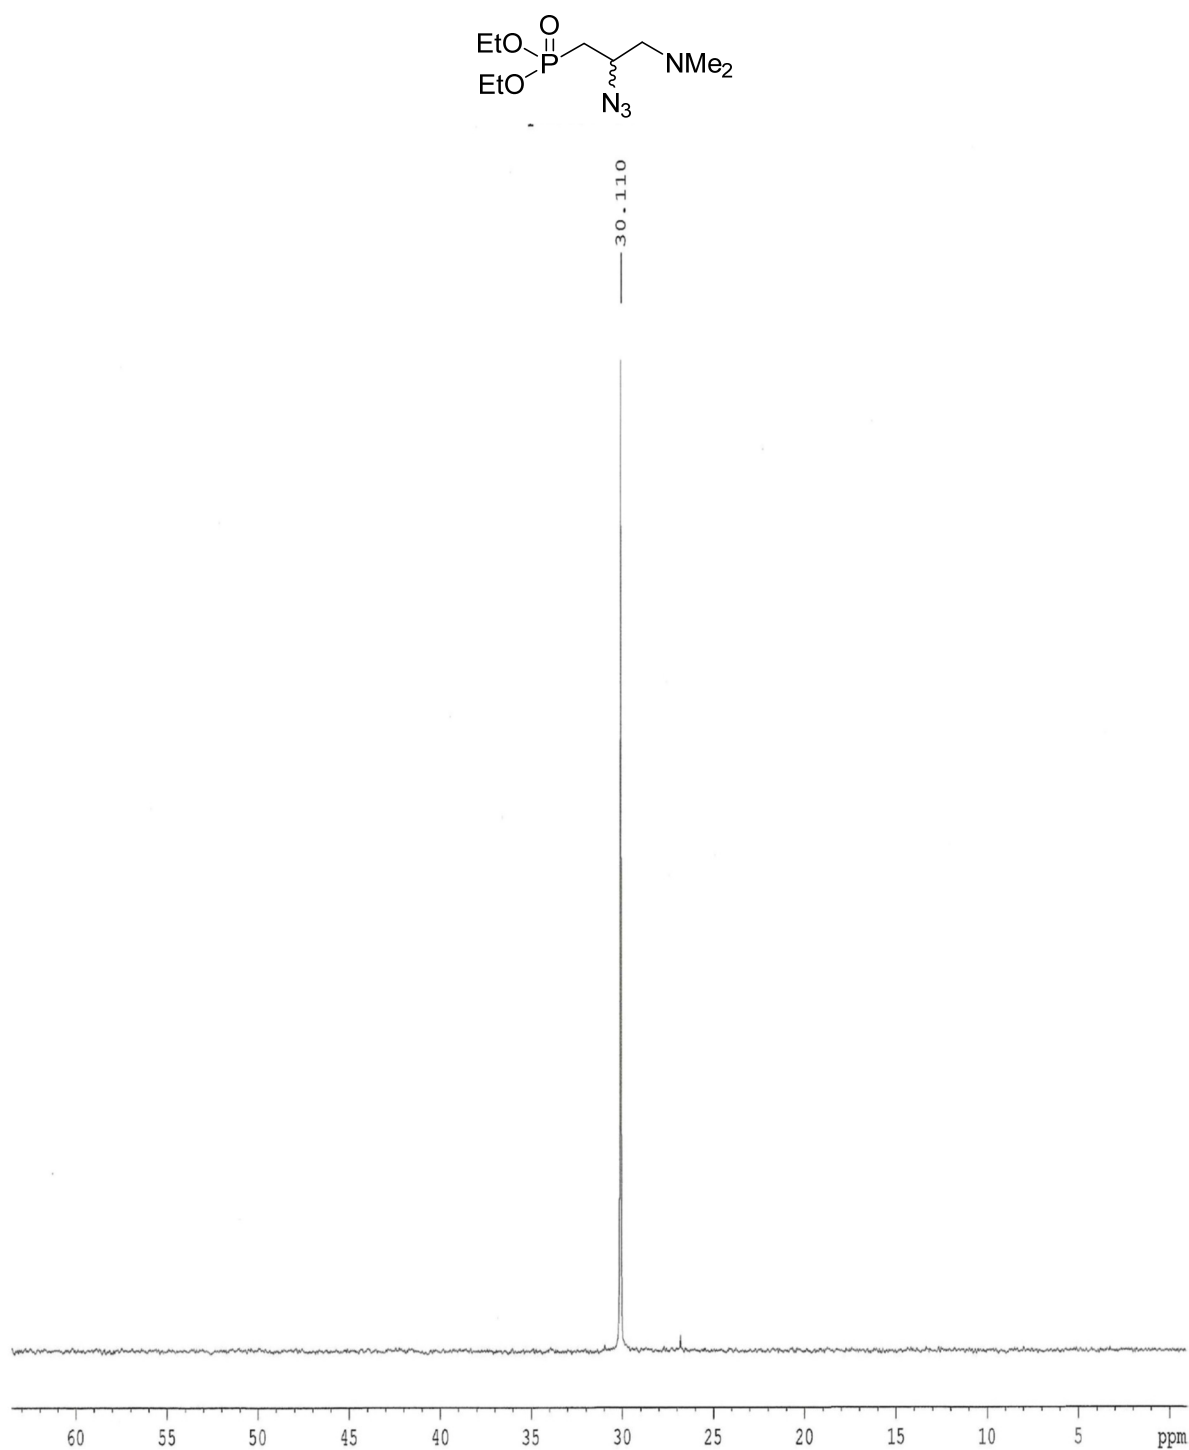

Diethyl 2-azido-3-*N,N*-dimethyloaminopropylphosphonate **11**  
<sup>1</sup>H NMR (CDCl<sub>3</sub>)

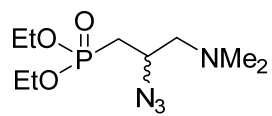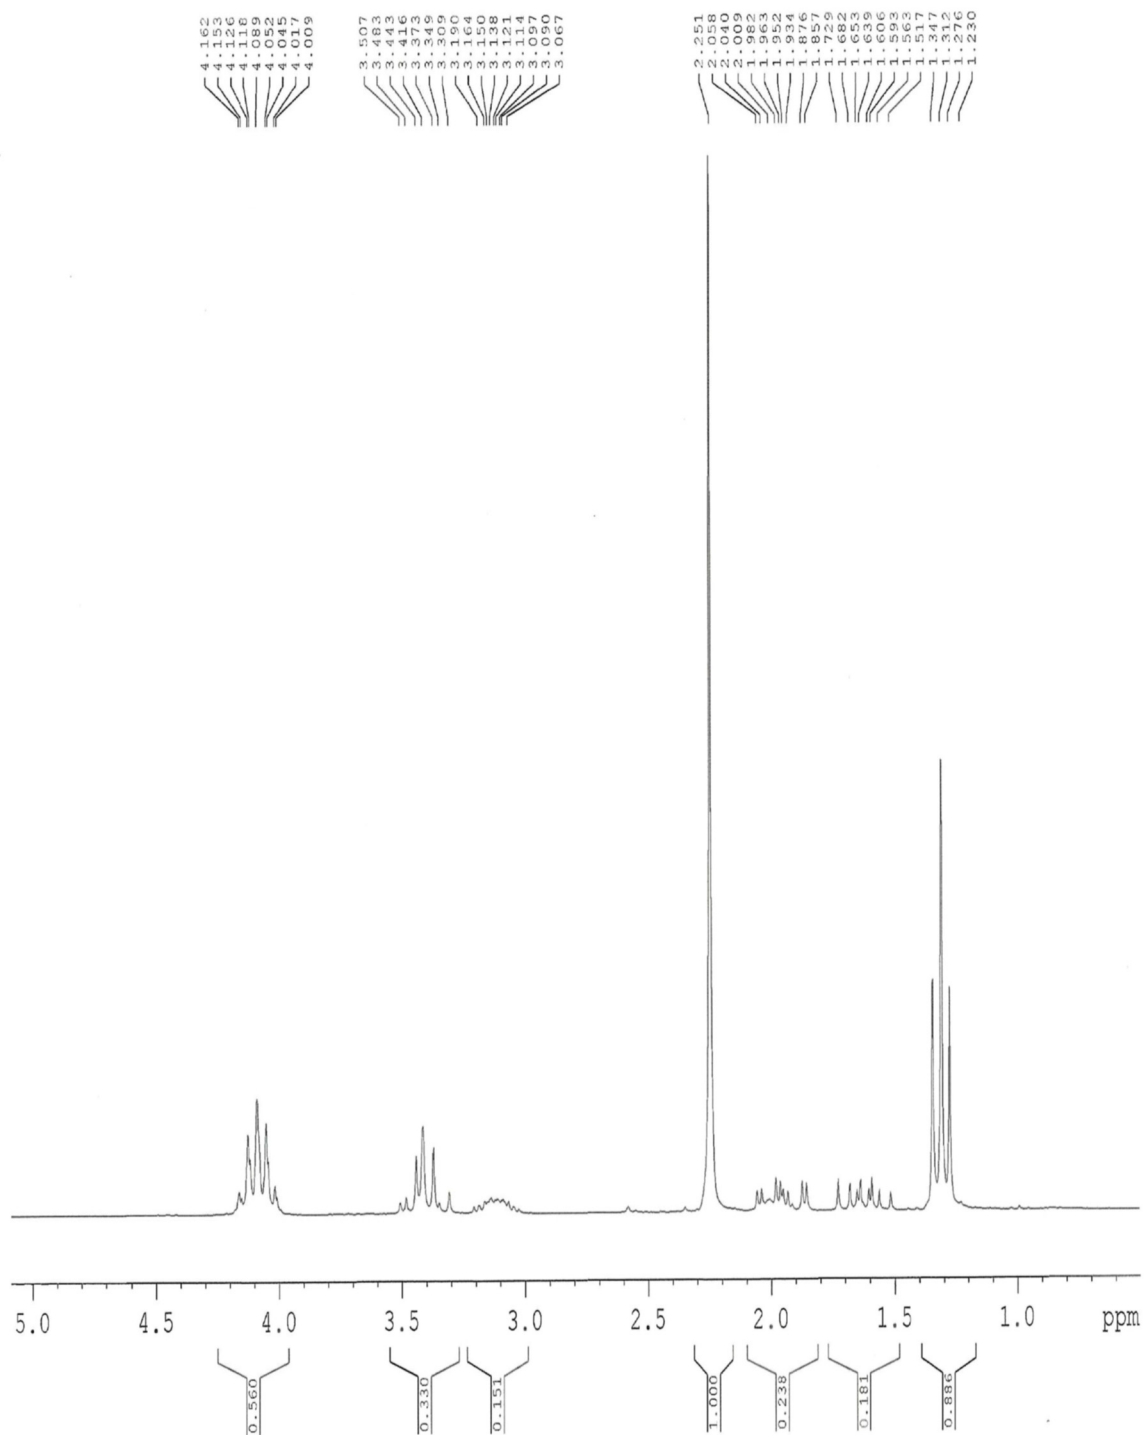

*Diethyl 2-amino-3-*N,N*-dimethyloaminopropylphosphonate* **12**  
<sup>31</sup>P NMR

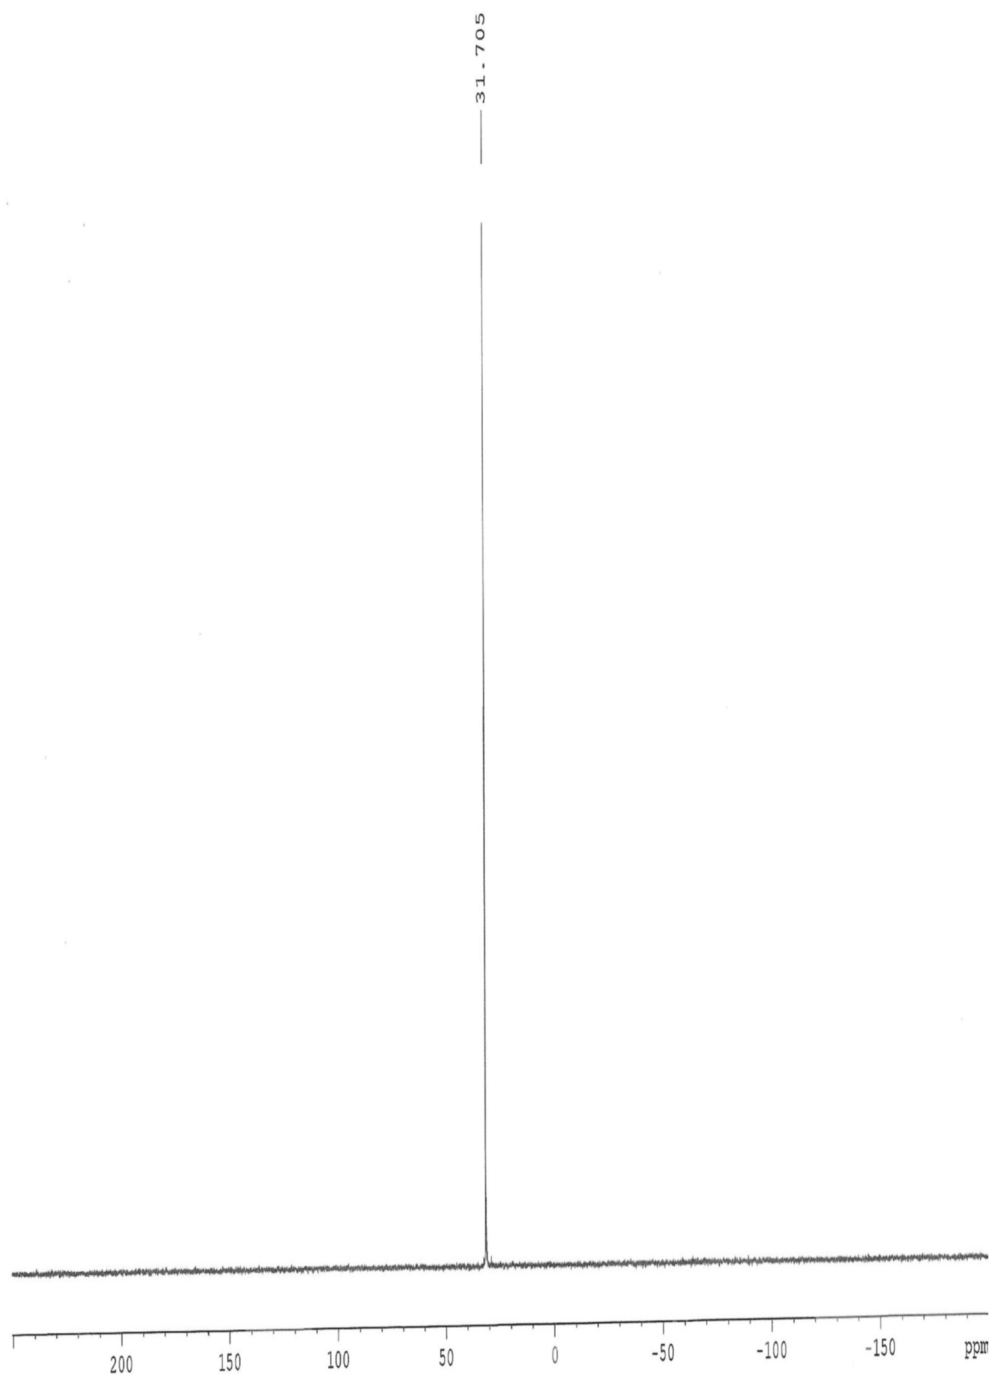

Diethyl 2-amino-3-*N,N*-dimethyloaminopropylphosphonate **12**

<sup>1</sup>H NMR

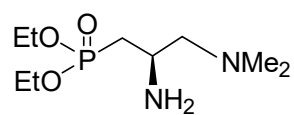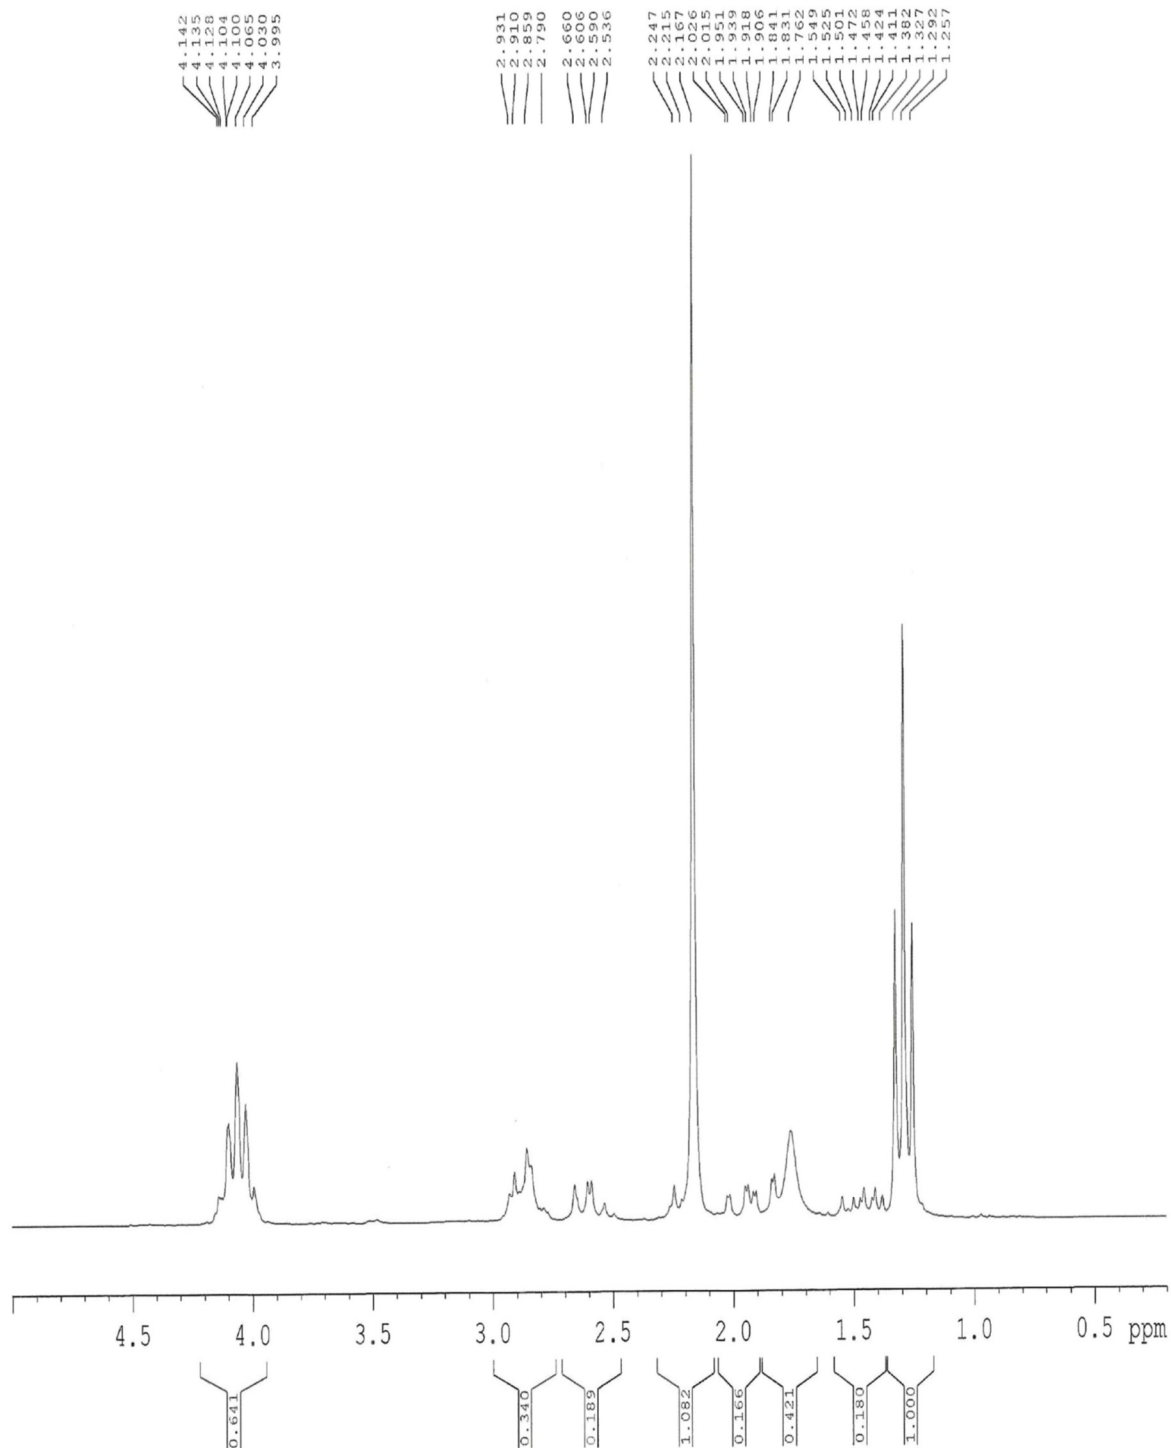

*Diethyl 2-amino-3-*N,N*-dimethylaminopropylphosphonate* **12**

$^{13}\text{C}\{^1\text{H}\}$  NMR

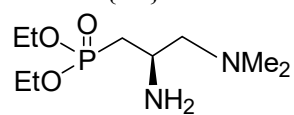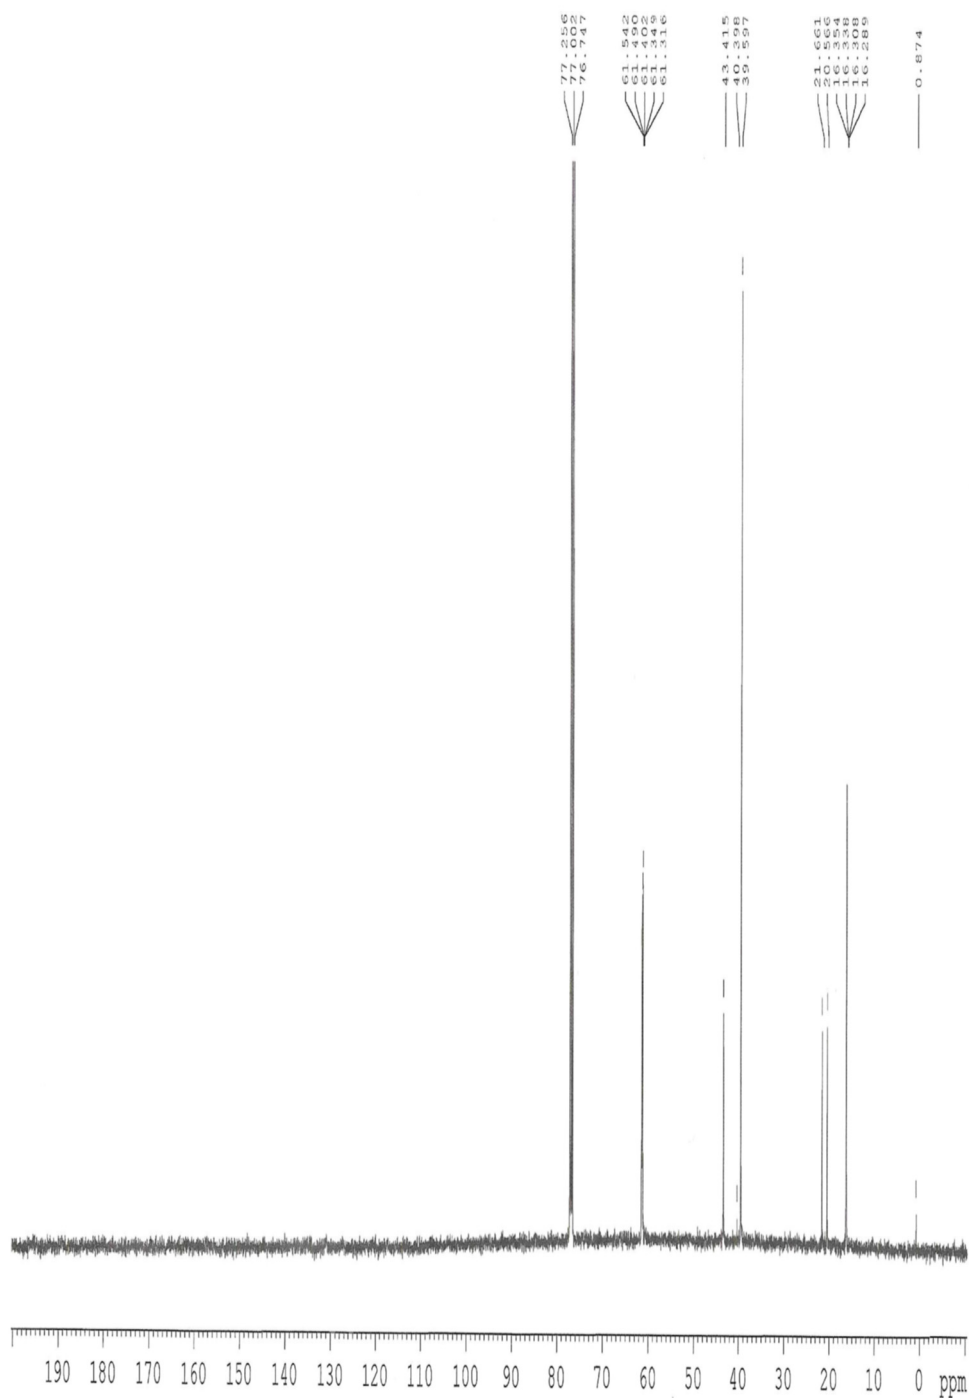

*N*-(Diethoxyphosphoryl)methyl(*N*',*N*'-dimethylaminomethyl)acetamide **13**

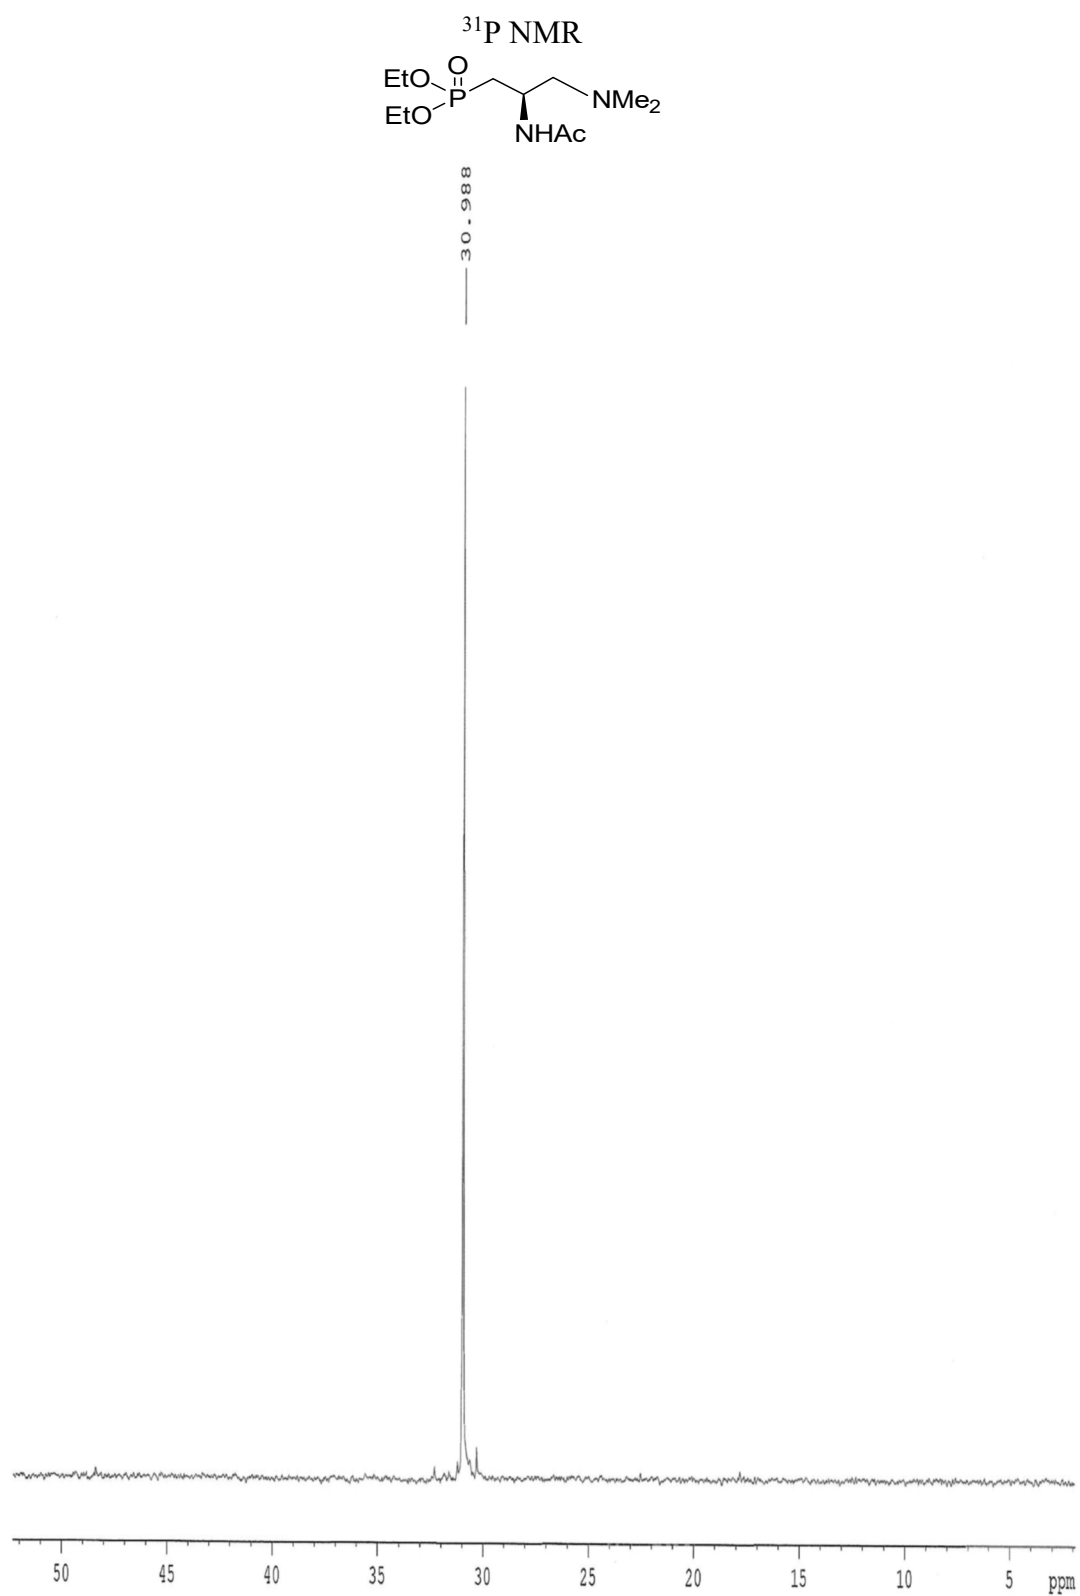

*N*-(Diethoxyphosphoryl)methyl(*N*',*N*'-dimethylaminomethyl)acetamide **13**

$^1\text{H}$  NMR

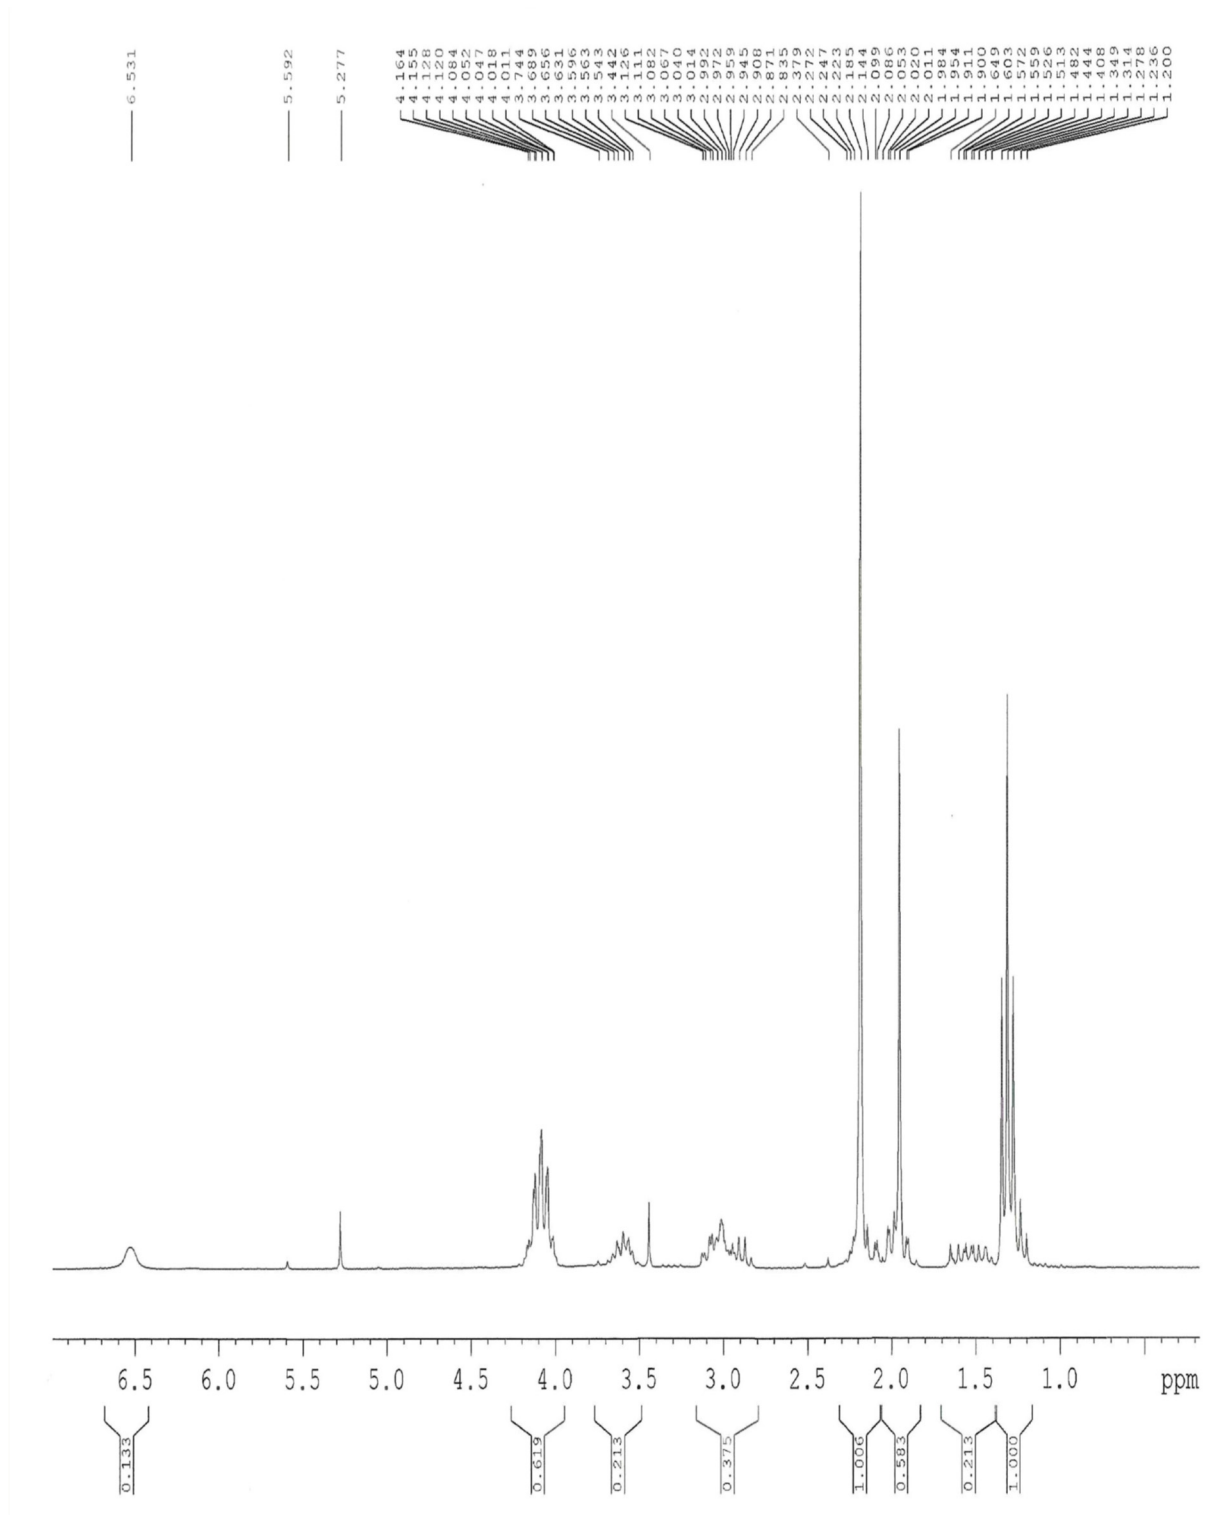

*N*-(Diethoxyphosphoryl)methyl(*N*',*N*'-dimethylaminomethyl)acetamide **13**  
 $^{13}\text{C}\{^1\text{H}\}$  NMR



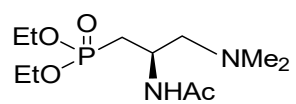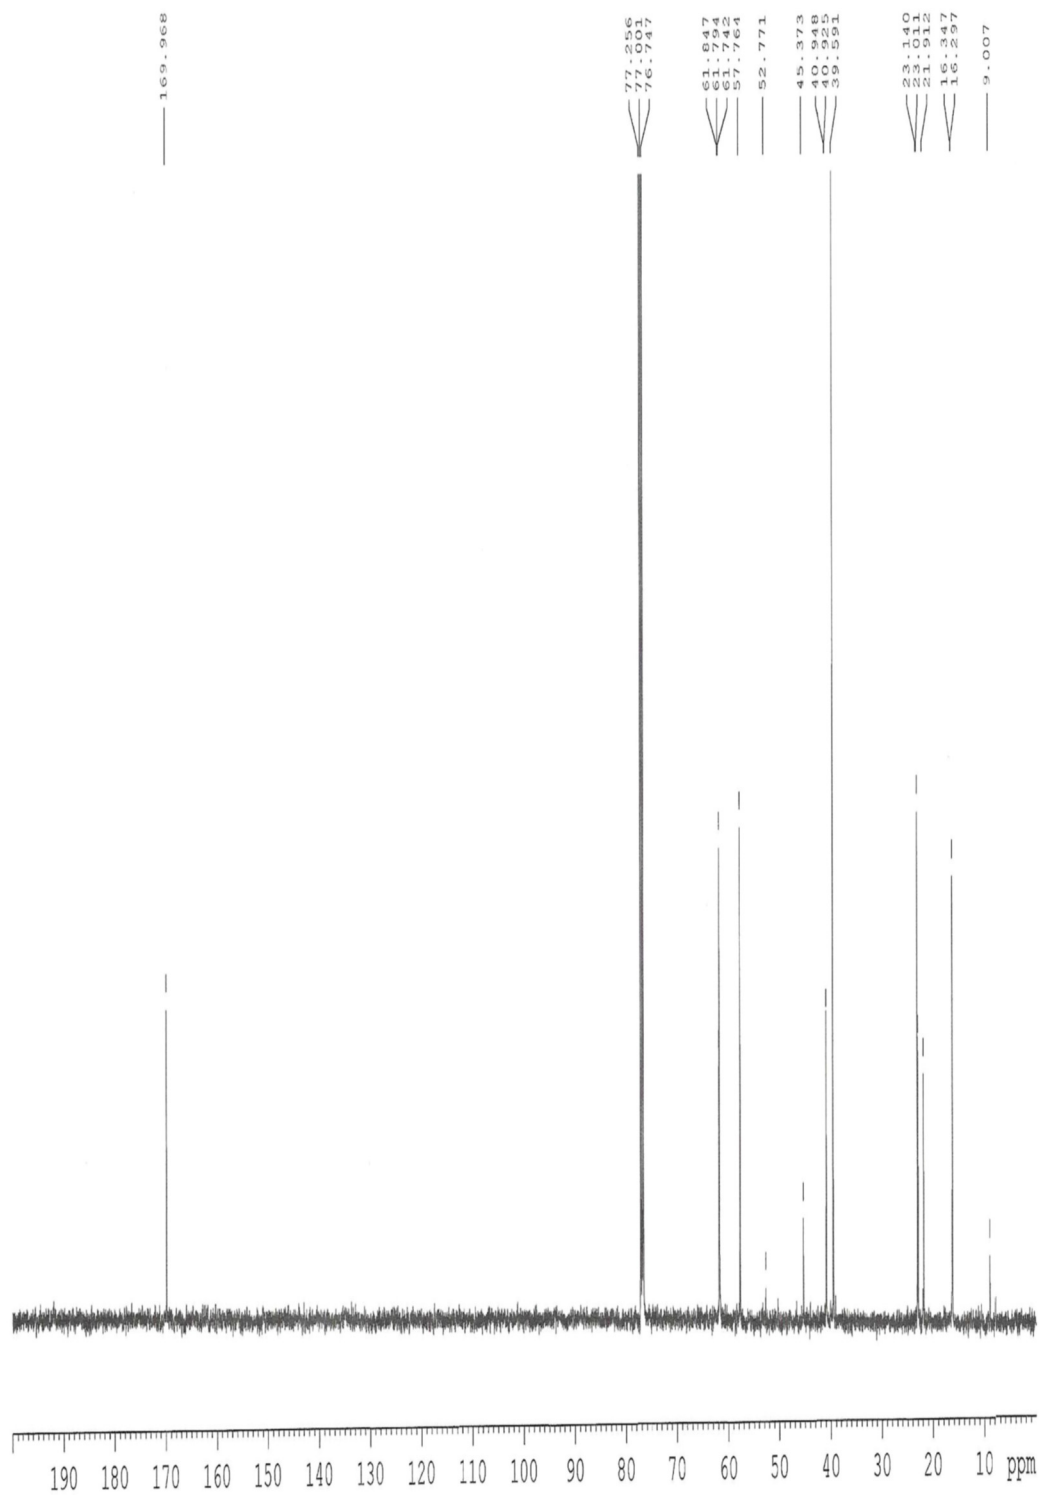

Trimethyl (2-acetamido)-(3-diethoxyphosphoryl)propylammonium iodide **14**

$^{31}\text{P}$  NMR ( $\text{D}_2\text{O}$ )

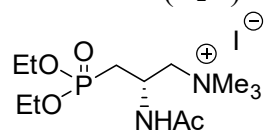

— 26.780

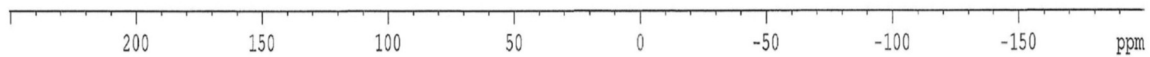

Trimethyl (2-acetamido)-(3-diethoxyphosphoryl)propylammonium iodide **14**

$^1\text{H}$  NMR ( $\text{D}_2\text{O}$ )

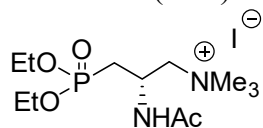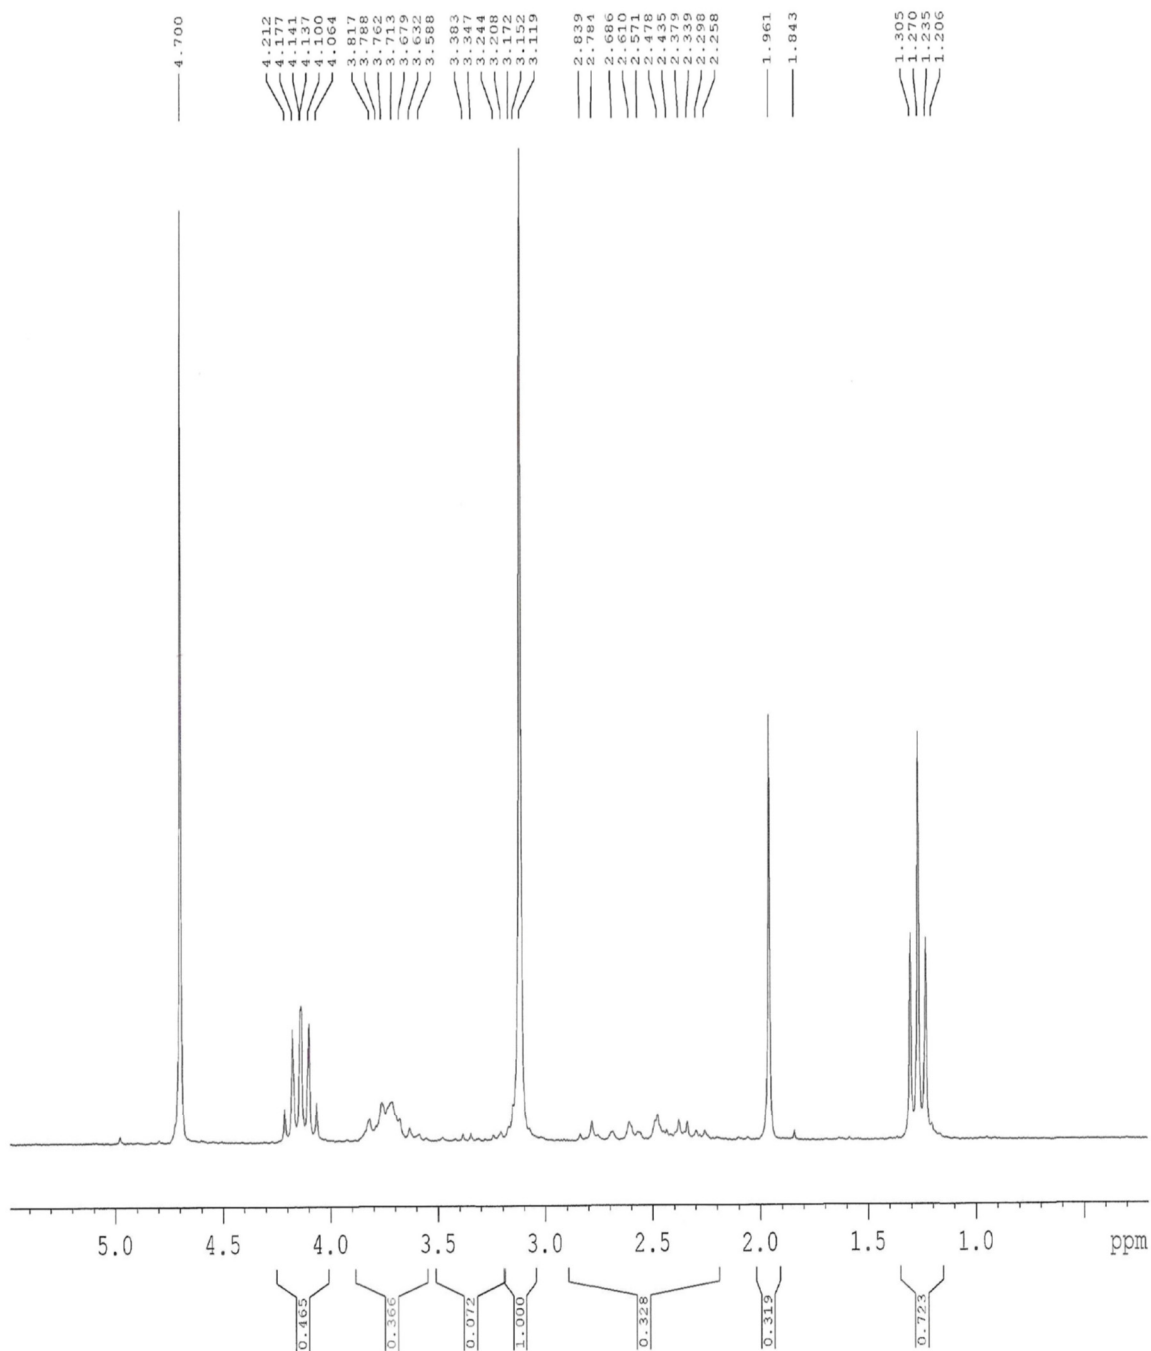

Trimethyl (2-acetamido)-(3-diethoxyphosphoryl)propylammonium iodide **14**

$^{13}\text{C}\{^1\text{H}\}$  NMR ( $\text{D}_2\text{O}$ )

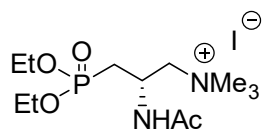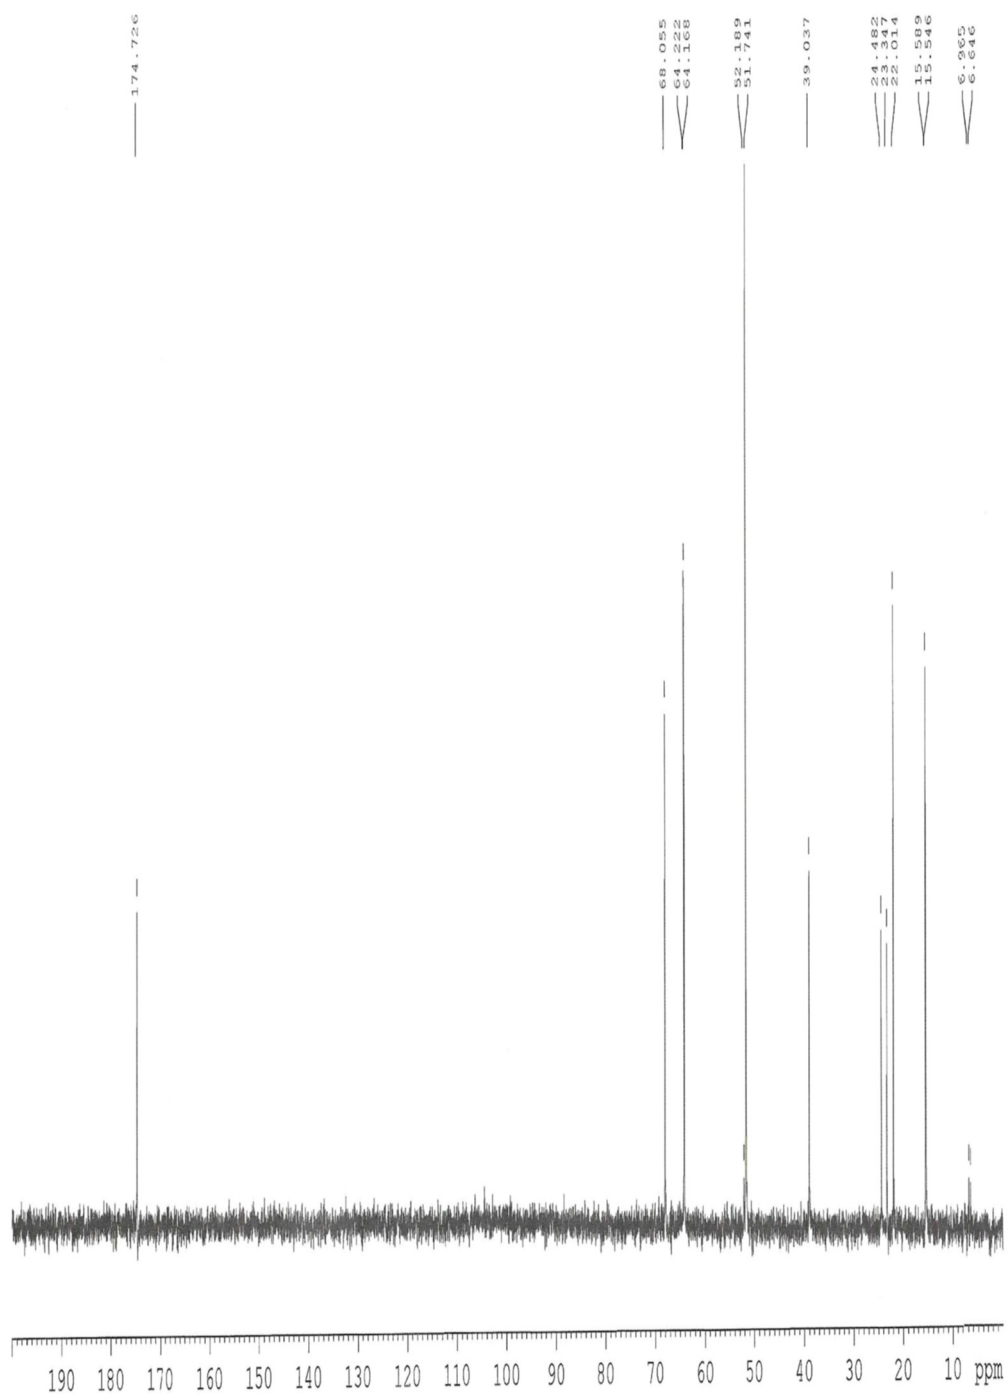

2-Amino-3-phosphoryl-1-trimethylammonium (emeriamine) sesquichloride **8a**  
<sup>31</sup>P NMR (D<sub>2</sub>O)

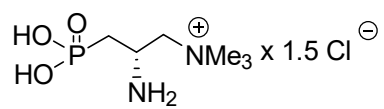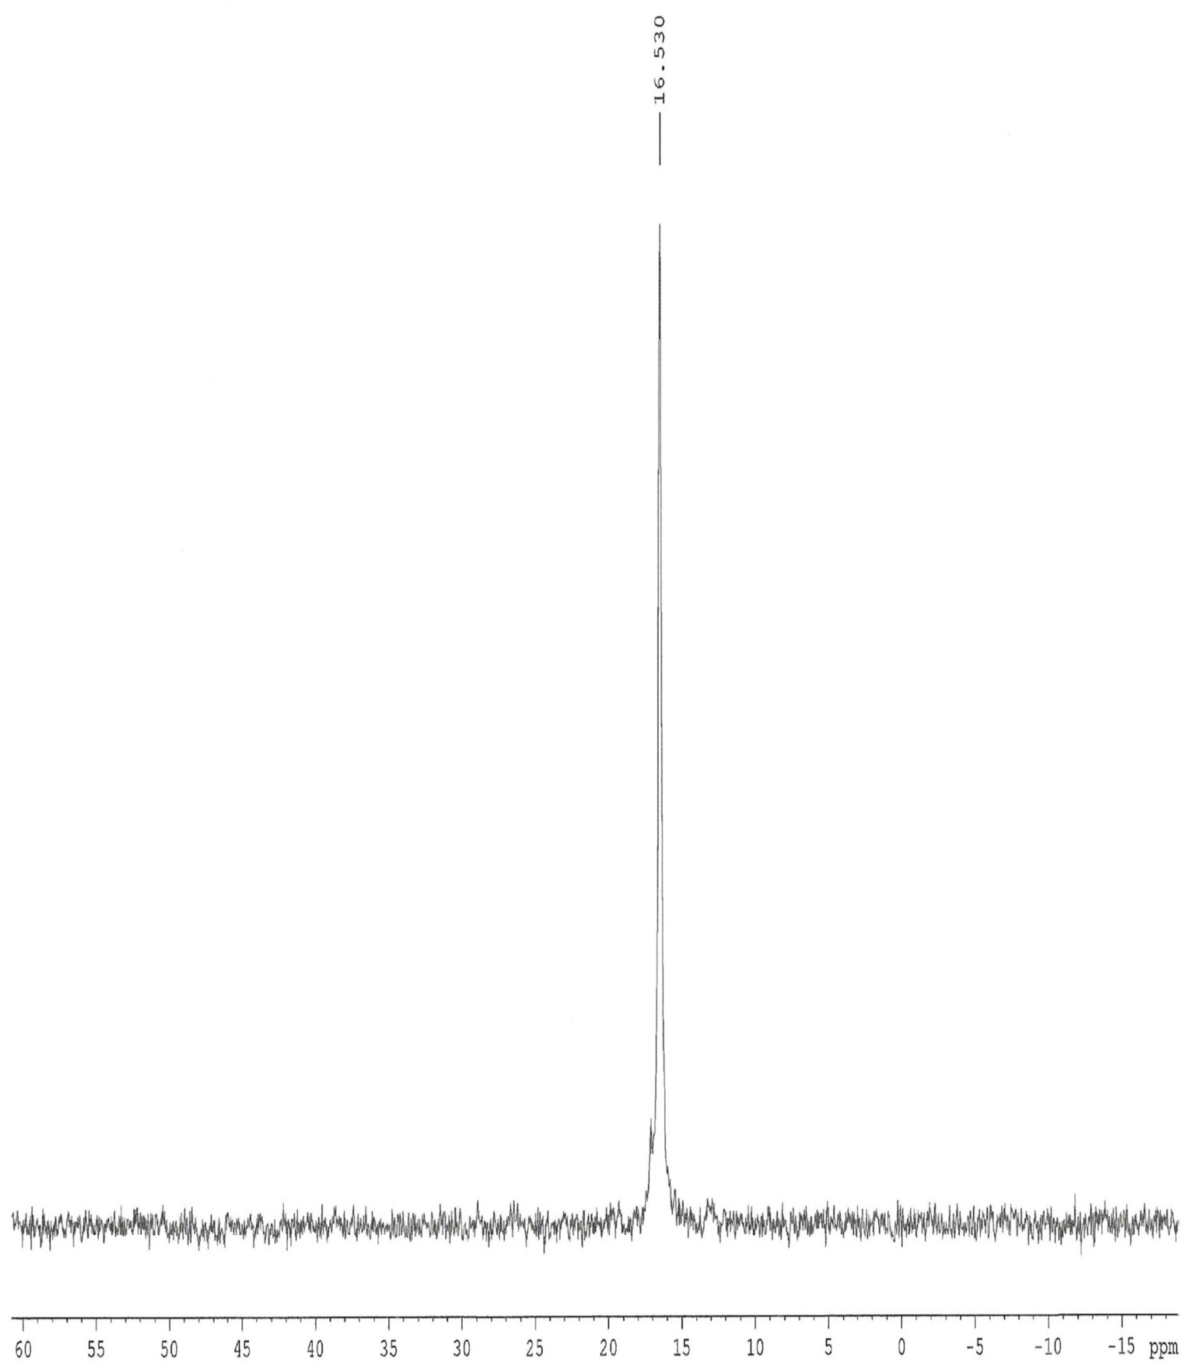

*2-Amino-3-phosphoryl-1-trimethylammonium (emeriamine) sesquichloride* **8a**  
 $^1\text{H}$  NMR ( $\text{D}_2\text{O}$ )

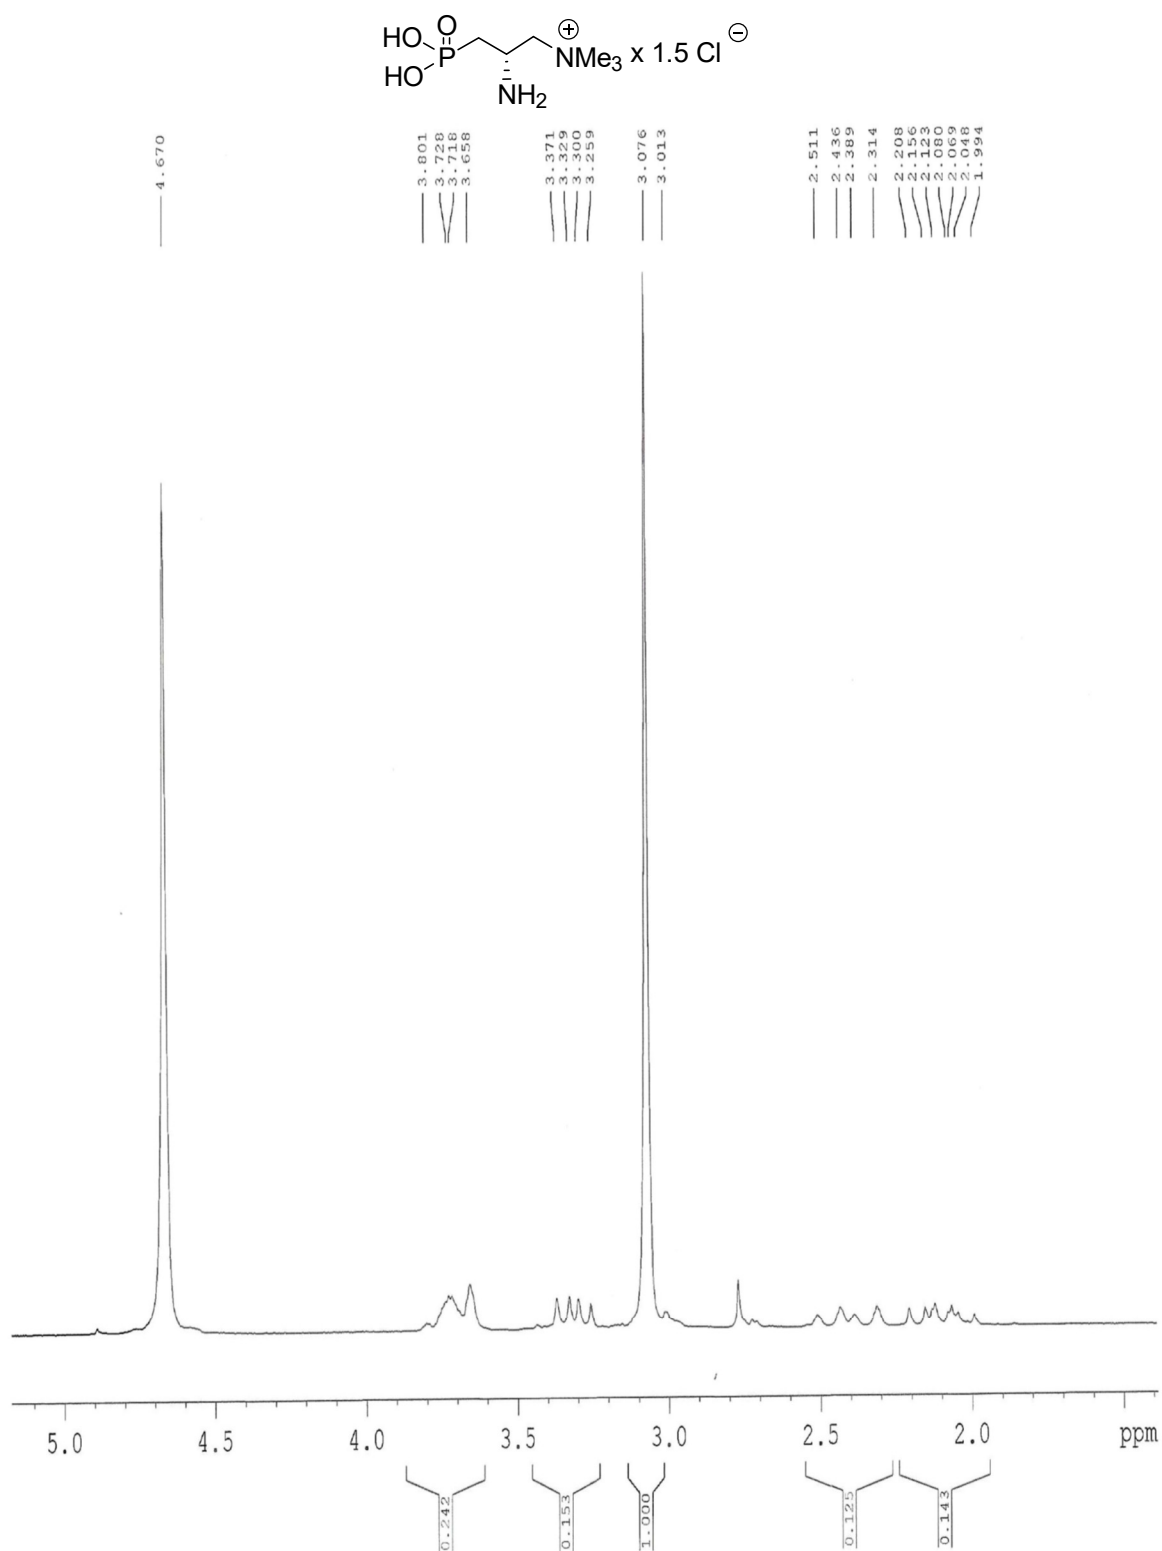

$^{31}\text{P}$  NMR control of the progress of the enzymatic kinetic resolution of *diethyl 2-amino-3-N,N*-dimethyloaminopropylphosphonate **12**

after 2 h

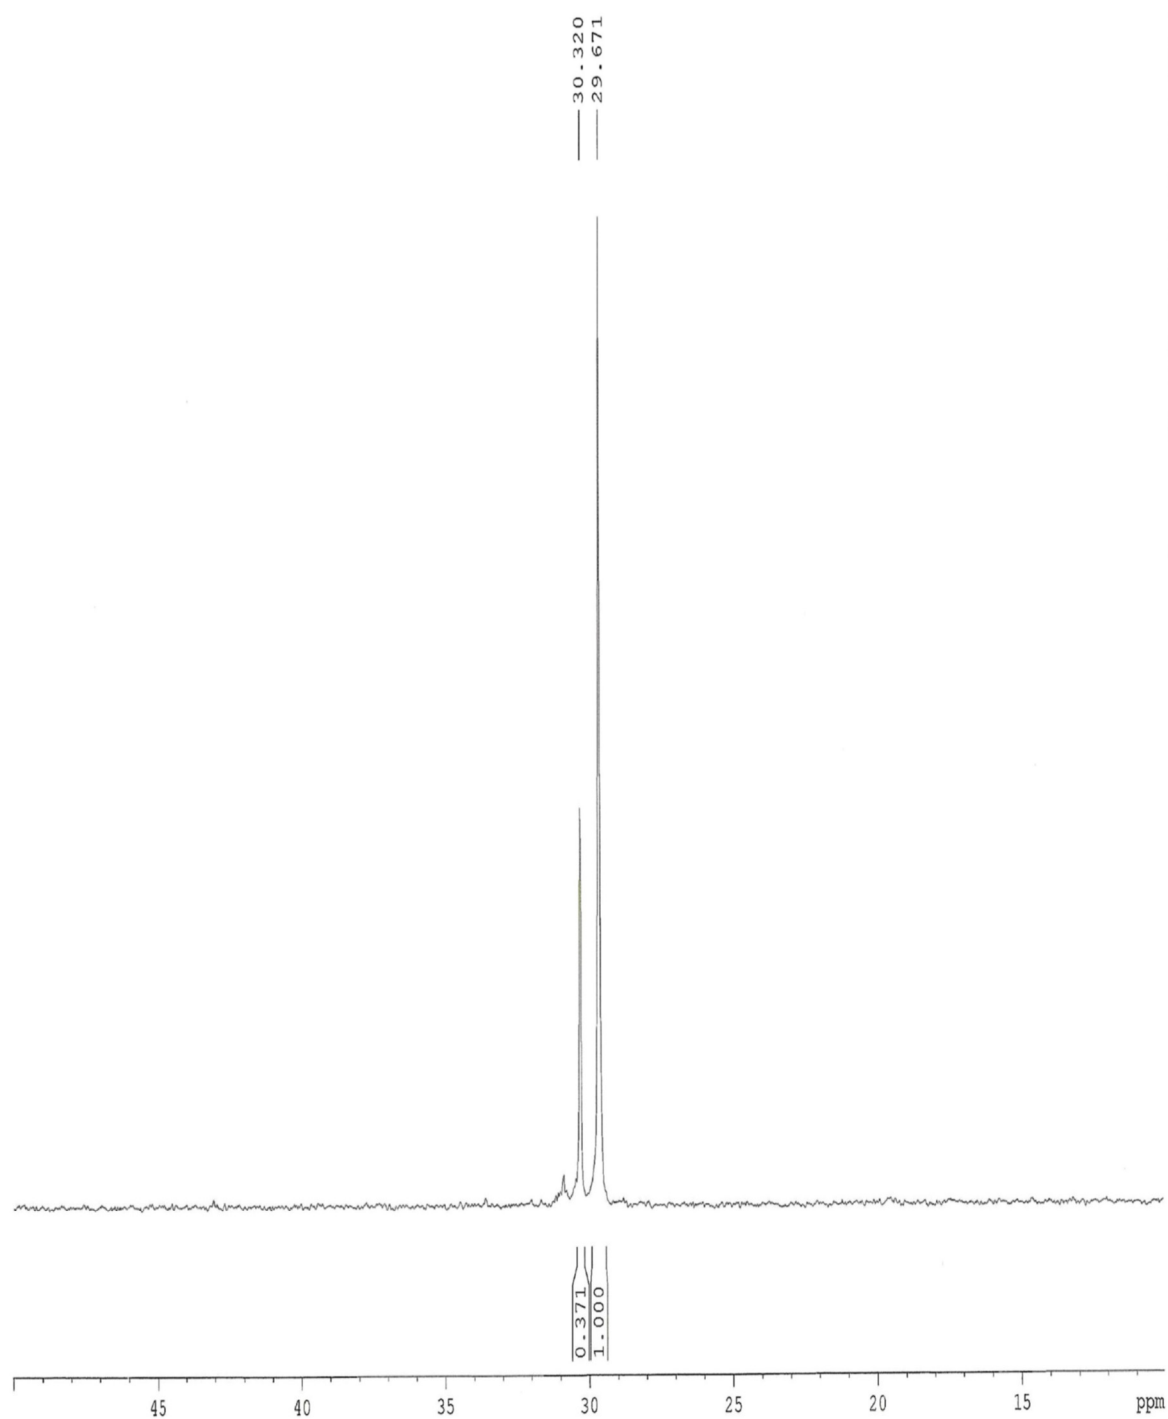

$^{31}\text{P}$  NMR control of the progress of the enzymatic kinetic resolution of *diethyl 2-amino-3- $N,N$ -dimethyloaminopropylphosphonate* **12**

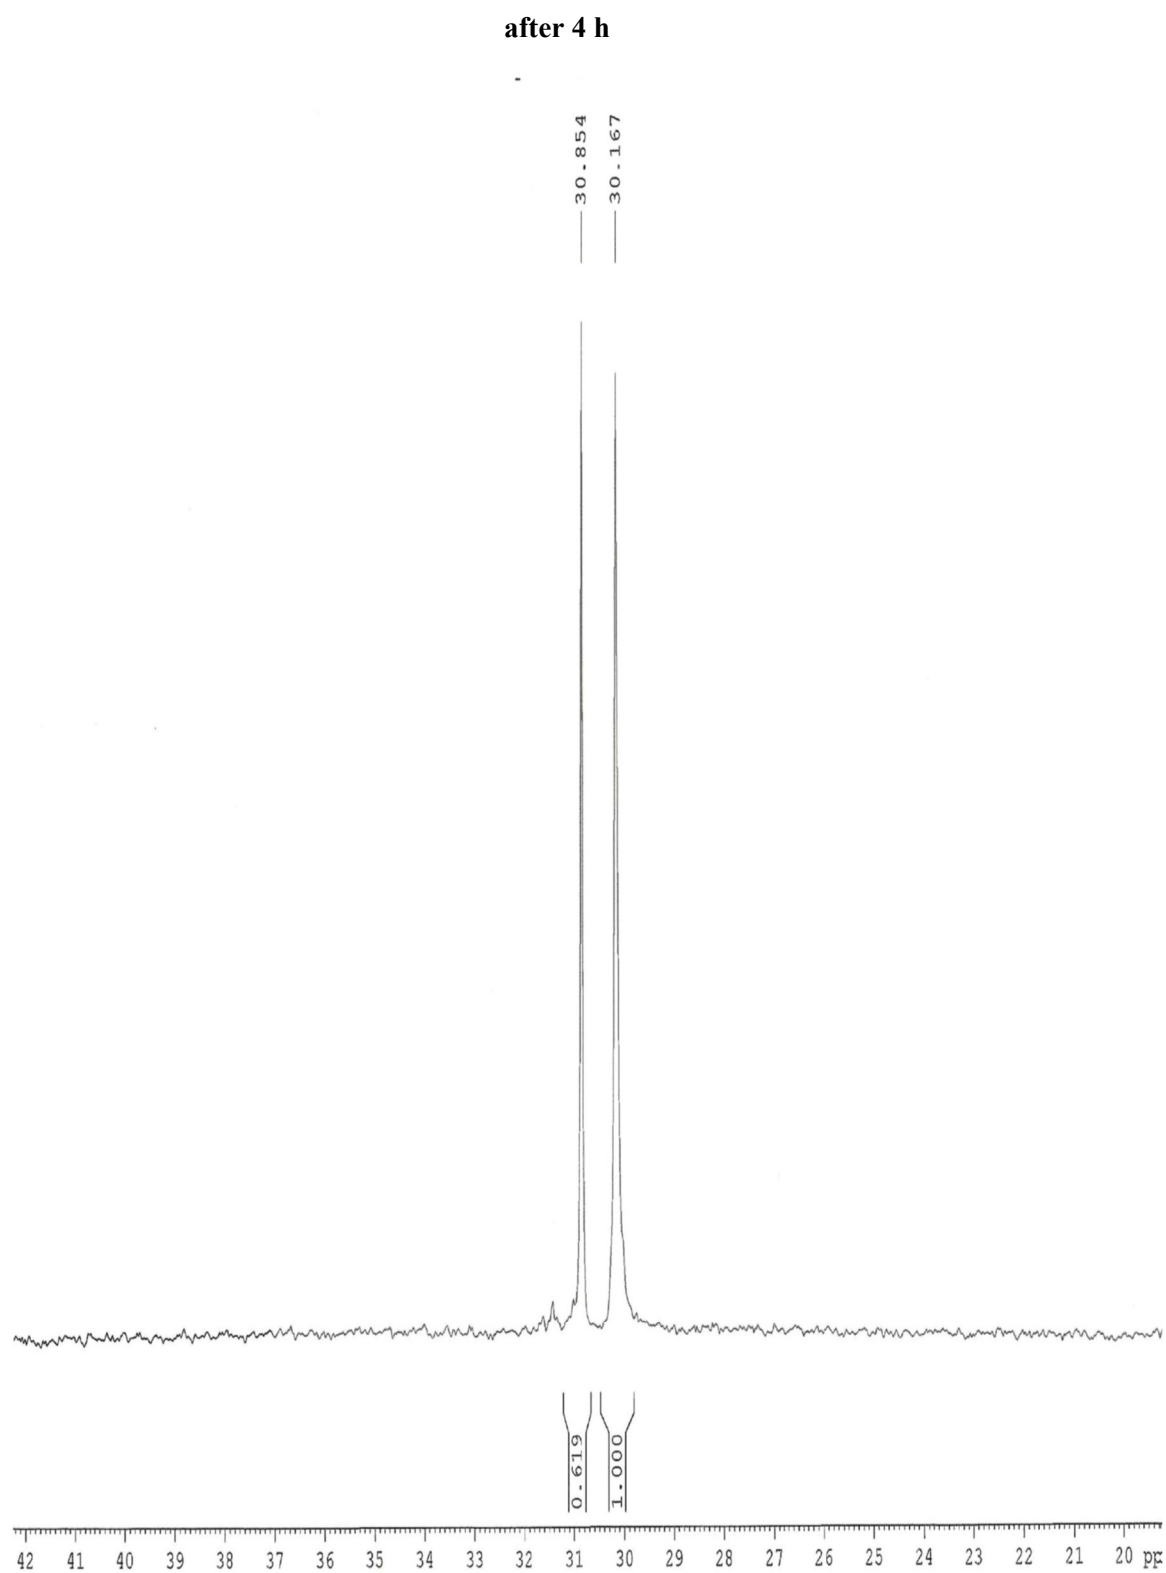

$^{31}\text{P}$  NMR control of the progress of the enzymatic kinetic resolution of *diethyl 2-amino-3- $N,N$ -dimethyloaminopropylphosphonate* **12**



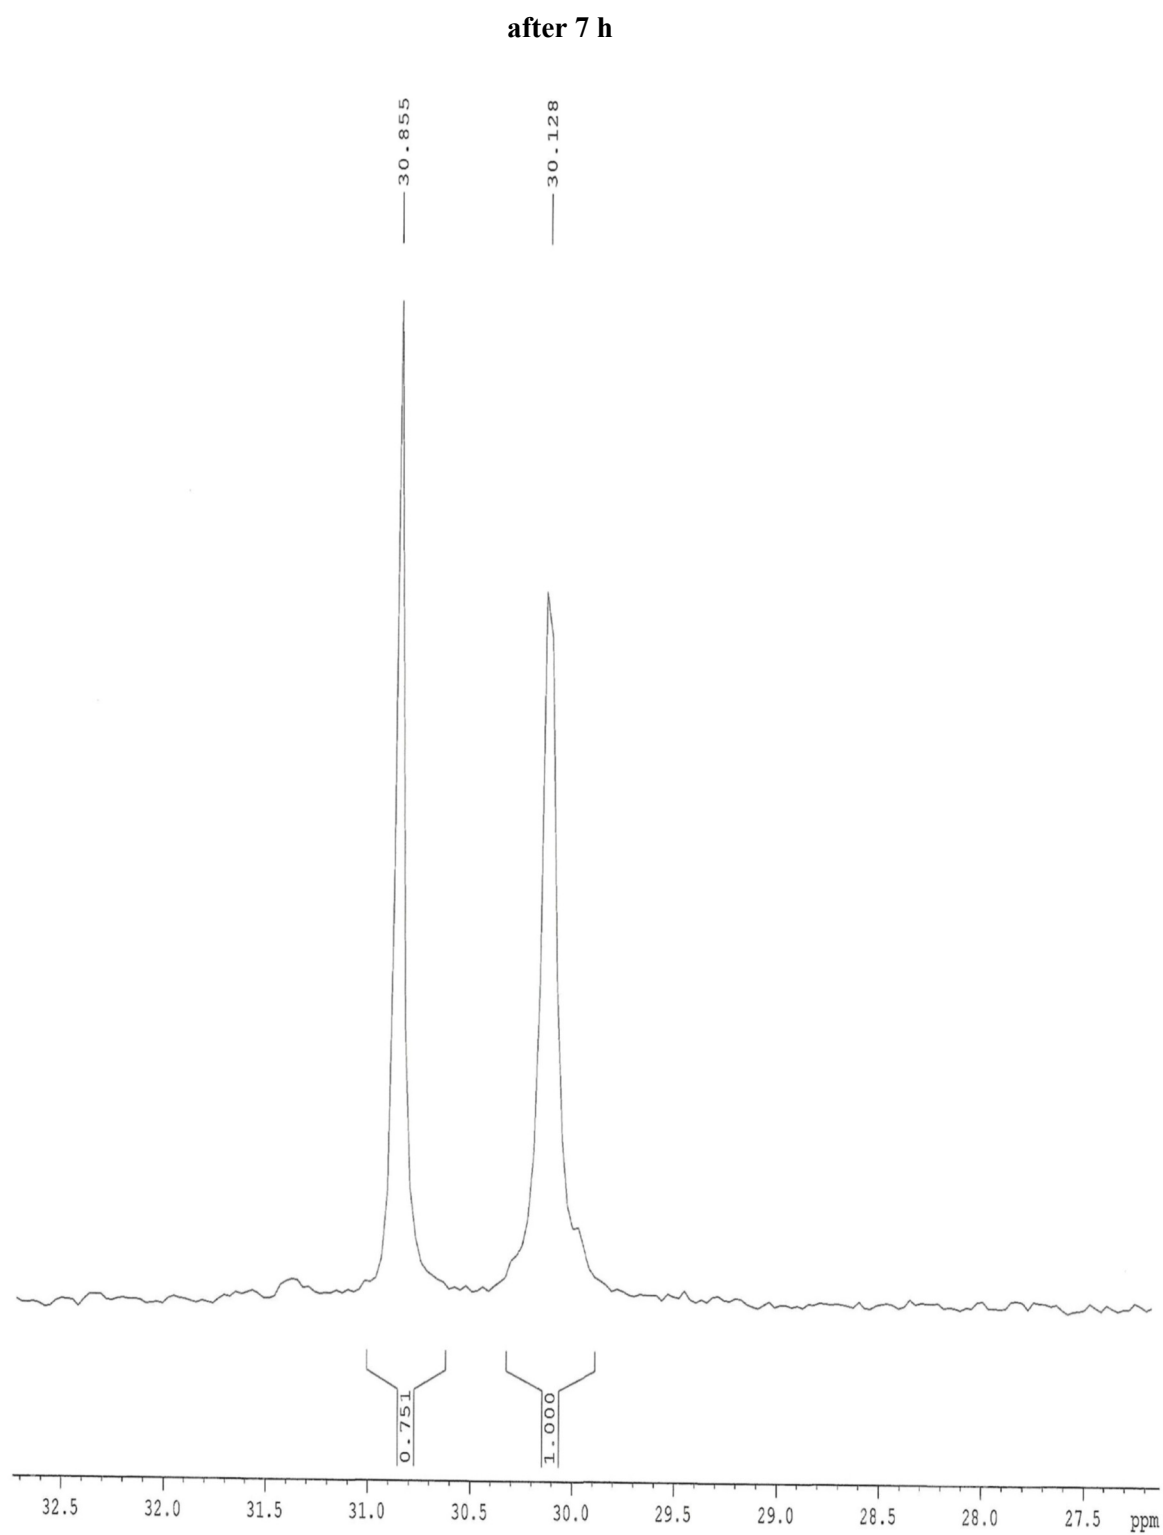

$^{31}\text{P}$  NMR control of the progress of the enzymatic kinetic resolution of *diethyl 2-amino-3-*N,N*-dimethyloaminopropylphosphonate* **12**

after 24 h

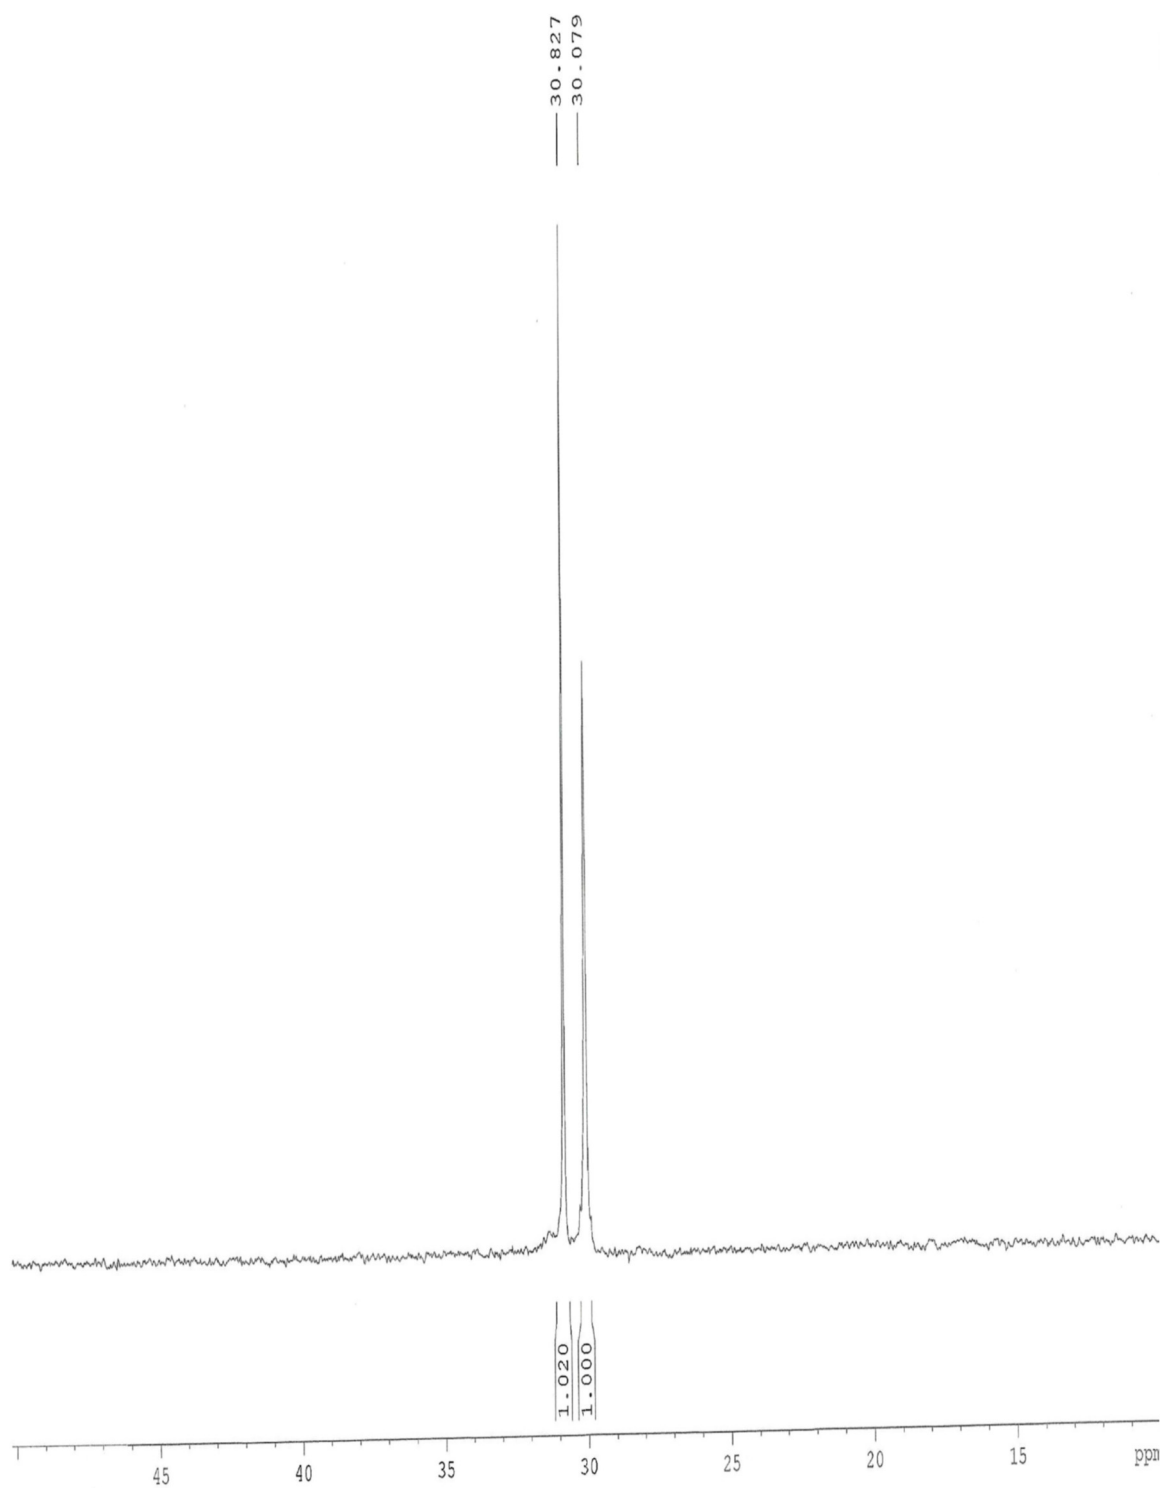

Determination of enantiomeric excess of *diethyl 2-amino-3-N,N-dimethyloaminopropylphosphonate* **12**

$^{31}\text{P}$  NMR ( $\text{CDCl}_3$ ) of racemic **12** with (+)-(*R*)-*t*-butylphenylphosphinothioic acid

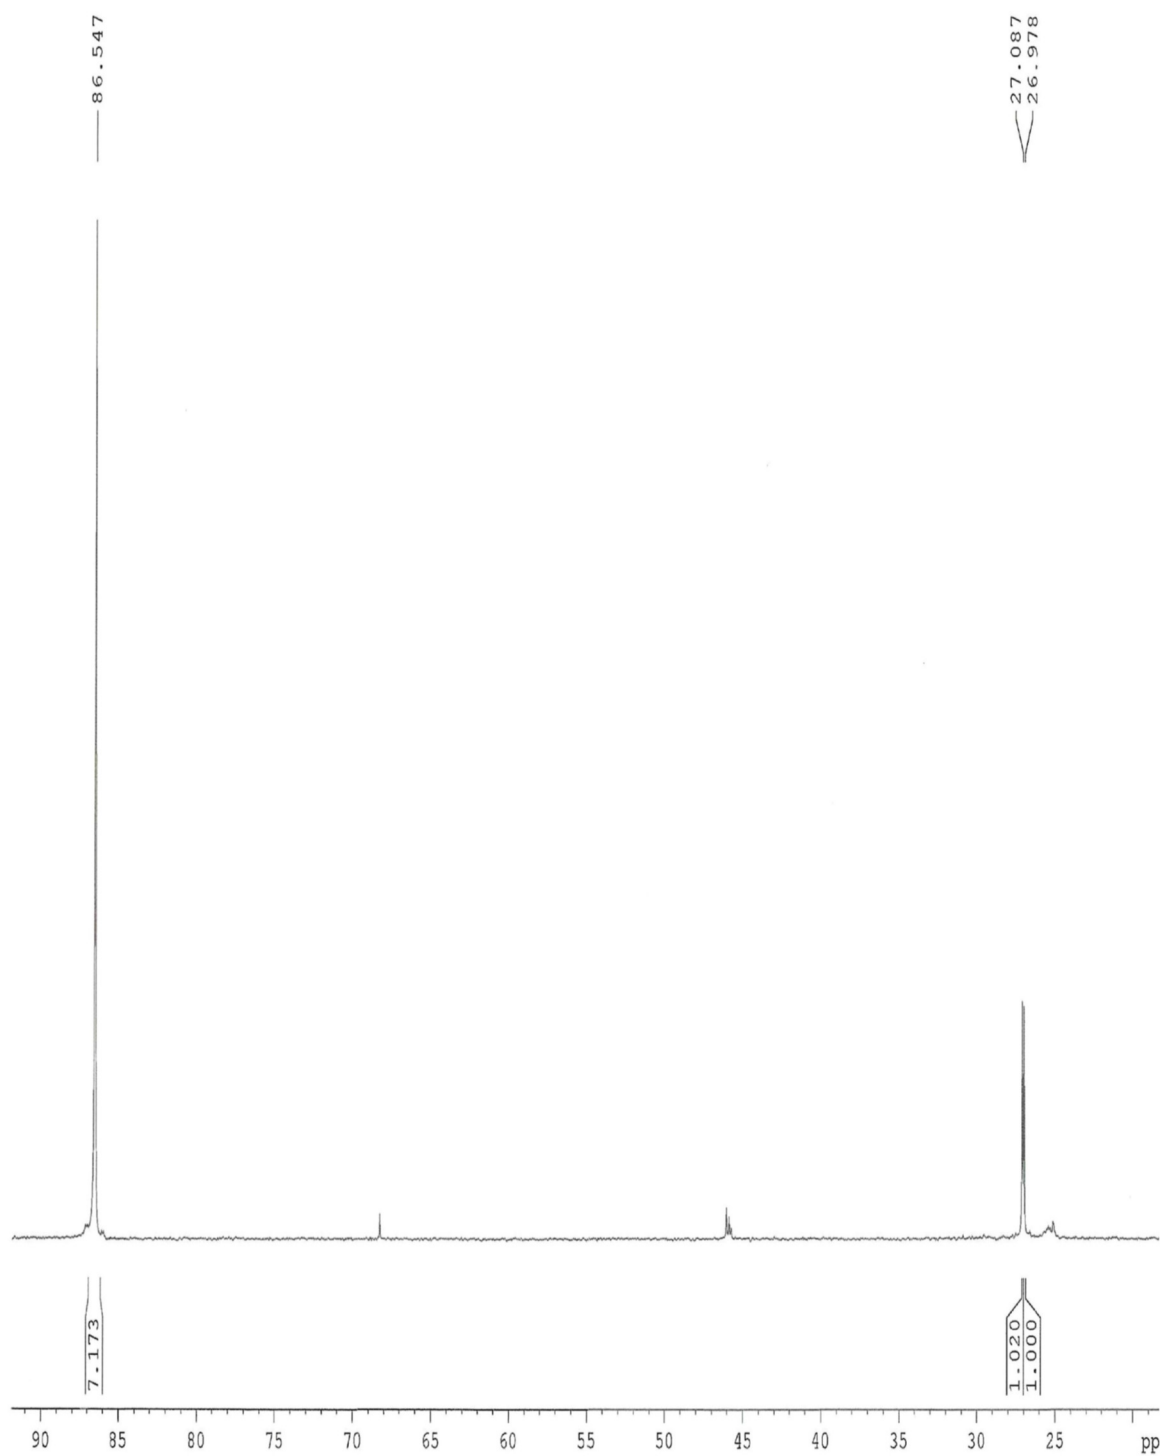

Determination of enantiomeric excess of *diethyl 2-amino-3-N,N*-

*dimethyloaminopropylphosphonate* **12**  
 $^{31}\text{P}$  NMR ( $\text{CDCl}_3$ ) of racemic **12** with (+)-(*R*)-*t*-butylphenylphosphinothioic acid;  
extension of the amine signals

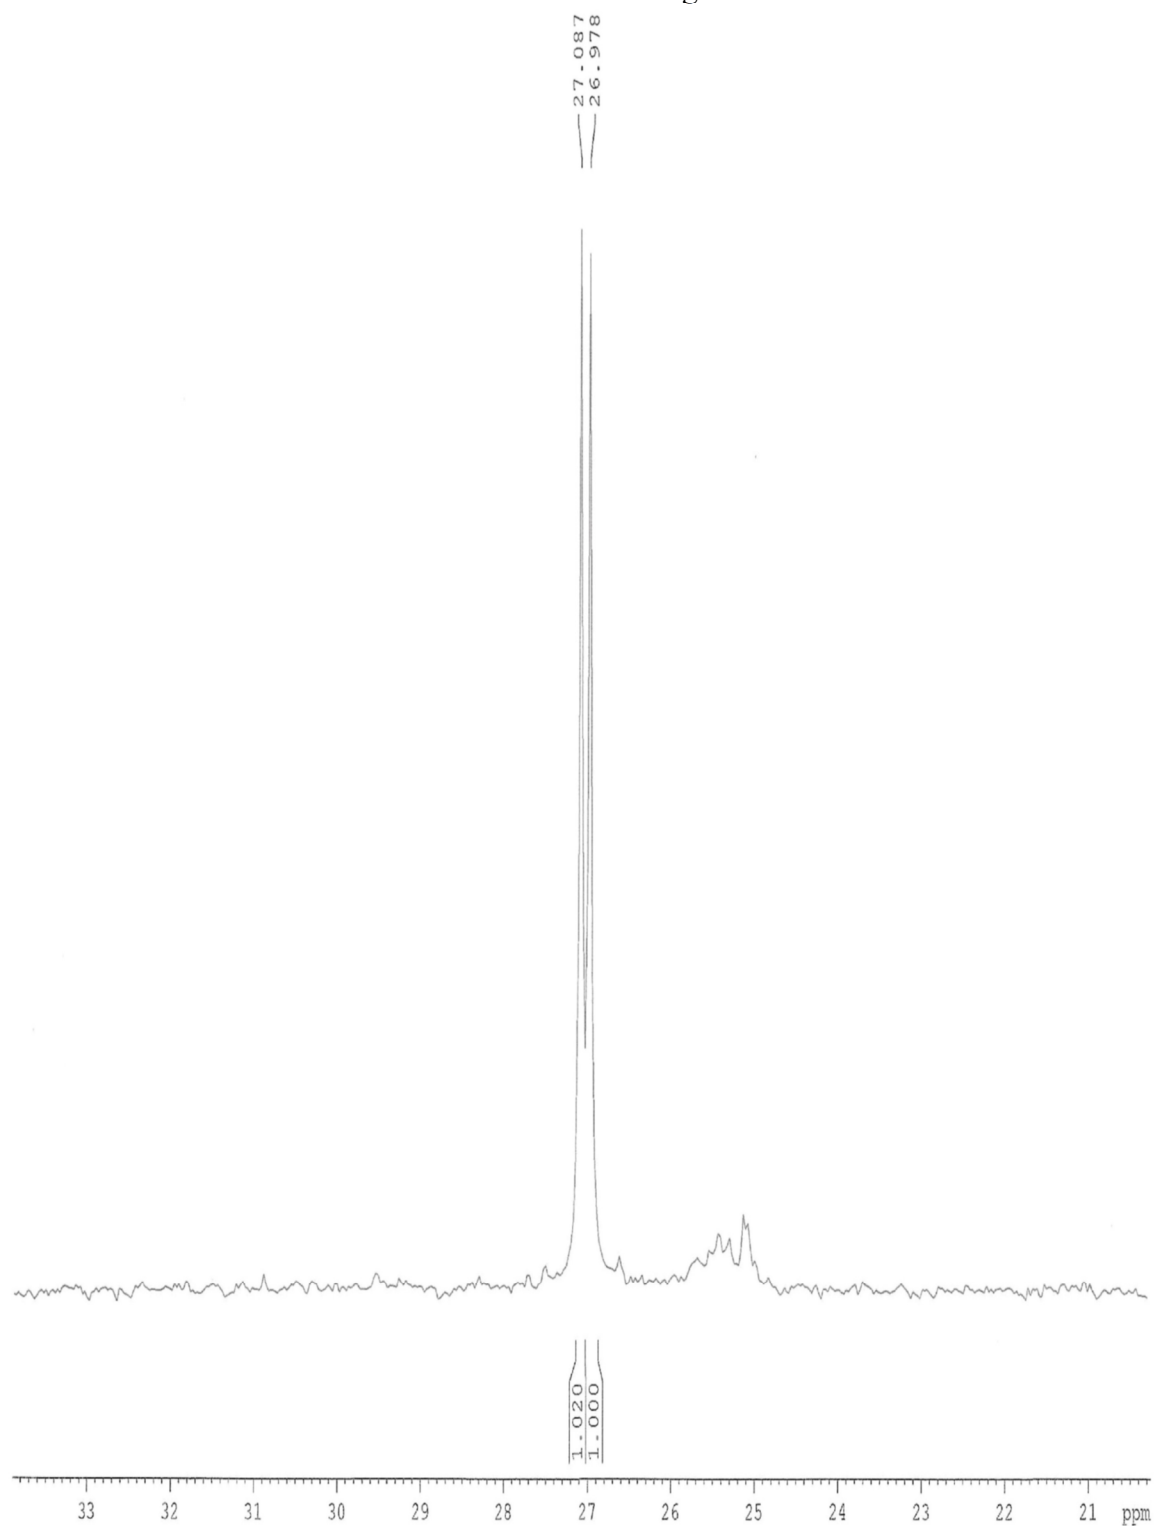

Determination of enantiomeric excess of *diethyl 2-amino-3-N,N*-

*dimethyloaminopropylphosphonate 12*  
 $^{31}\text{P}$  NMR ( $\text{CDCl}_3$ ) of enantiomerically enriched (+)-(*R*)-**12**  
 with (+)-(*R*)-*t*-butylphenylphosphinothioic acid

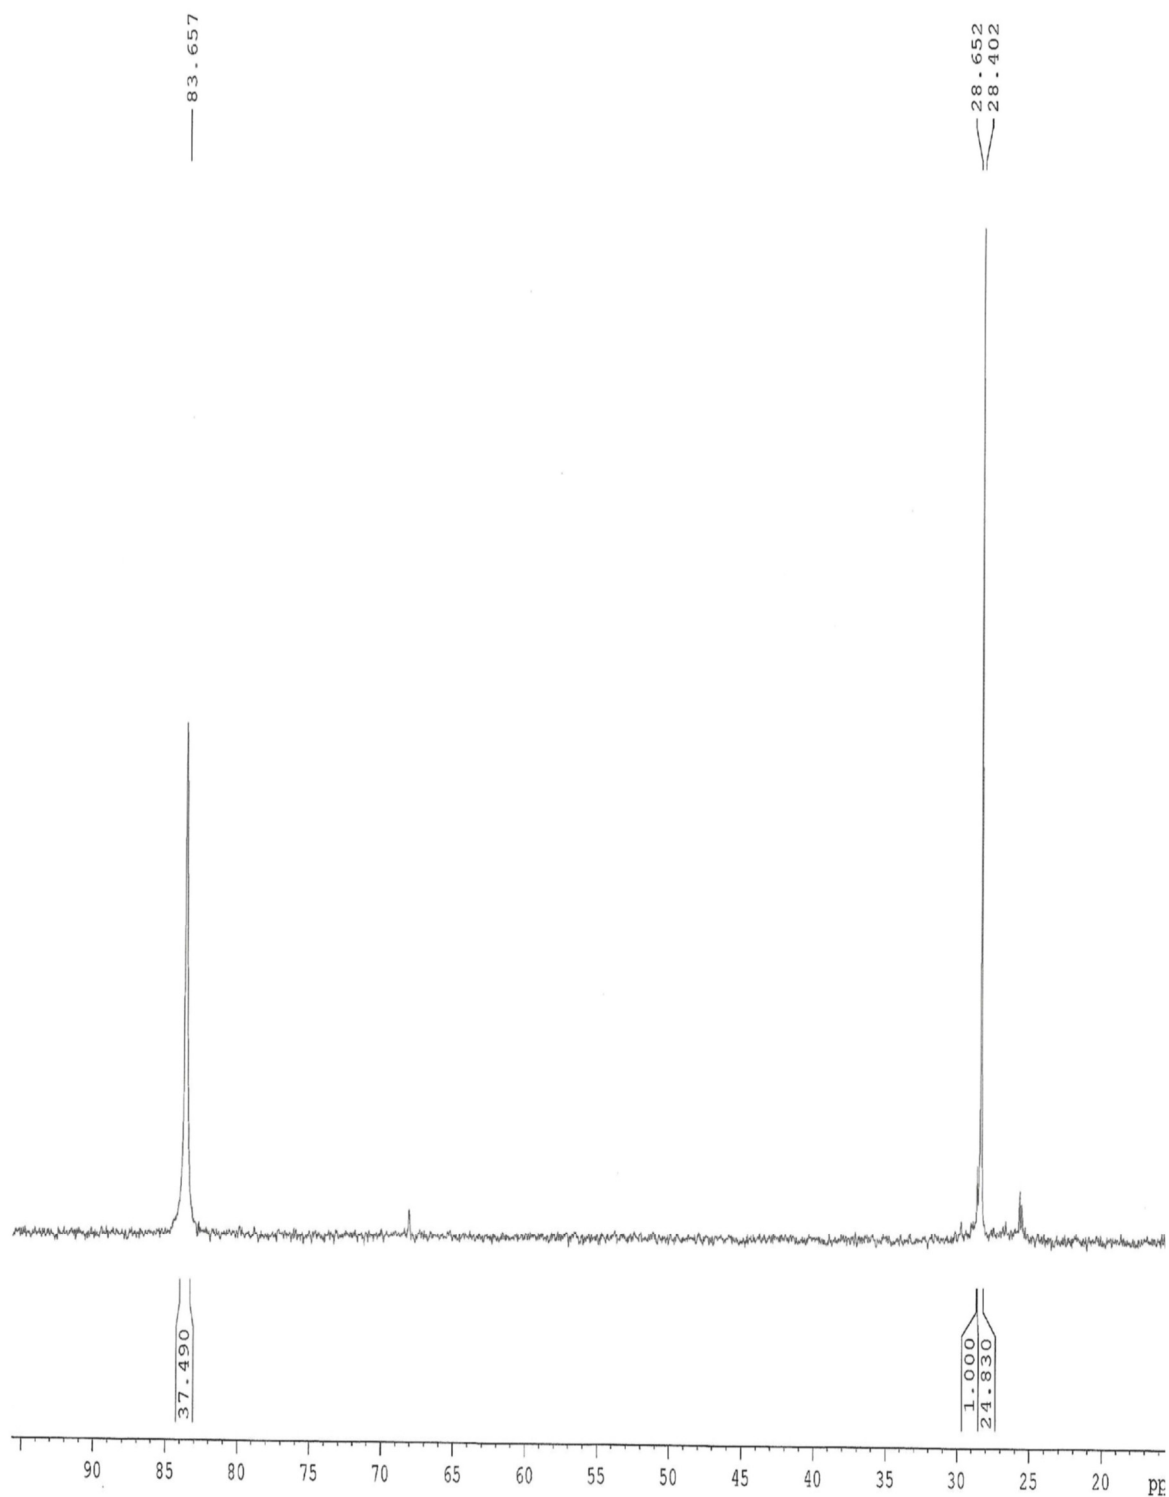

Determination of enantiomeric excess of *diethyl 2-amino-3-N,N*-*dimethyloaminopropylphosphonate 12*  
 $^{31}\text{P}$  NMR ( $\text{CDCl}_3$ ) of enantiomerically enriched (+)-(*R*)-**12**  
 with (+)-(*R*)-*t*-butylphenylphosphinothioic acid

extension of the amine signals

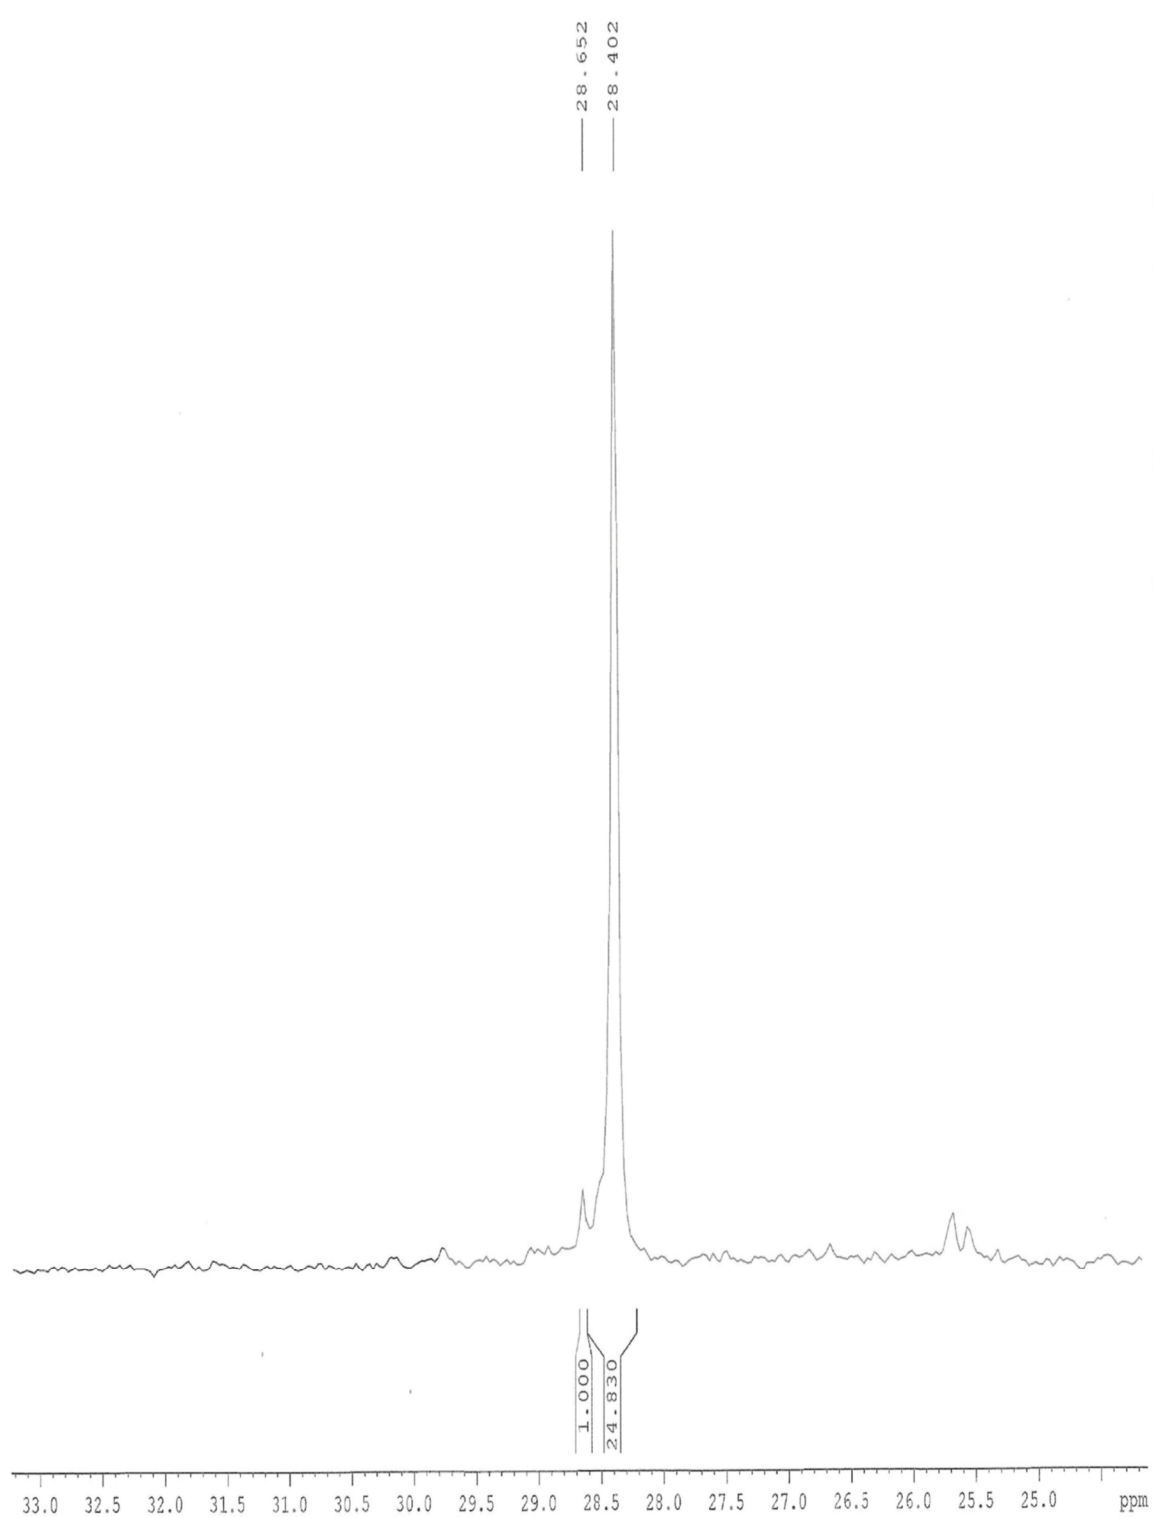

Supplement: s1 [file s1]
